# Supplementary material for: An efficient way to reduce graphene oxide by water elimination using phosphoric acid
Source: Royal Society of Chemistry journal article supplement (doi:10.1039/c4ra03204g), 2014-06-13
Supplement: c4ra03204g1.pdf [file c4ra03204g1.pdf]

## Supporting Information

### An efficient way to reduce graphene oxide by water elimination using phosphoric acid

Engin Er <sup>a</sup>, Hüseyin Çelikkan <sup>b,\*</sup>

<sup>a</sup> Department of Analytical Chemistry, Faculty of Pharmacy, Ankara University, Ankara, Turkey

<sup>b</sup> Department of Chemistry, Faculty of Science, Gazi University, Ankara, Turkey

\* E-mail: celikkan@gazi.edu.tr

The heterogeneous electron transfer rates of NaBH<sub>4</sub>-G, H<sub>2</sub>SO<sub>4</sub>-G and H<sub>3</sub>PO<sub>4</sub>-G were determined with Nicholson<sup>1</sup> method using the cyclic voltammograms of Fe(CN)<sub>6</sub><sup>3-</sup>. The GC electrodes covered by NaBH<sub>4</sub>-G, H<sub>2</sub>SO<sub>4</sub>-G and H<sub>3</sub>PO<sub>4</sub>-G gave heterogeneous electron rate constants ( $k^0$ ) of  $0.00313 \pm 0.00043$ ,  $0.0122 \pm 0.0096$  and  $0.0305 \pm 0.00293$  cm.s<sup>-1</sup> by the use of Equation 1 for 1.0 mM Fe(CN)<sub>6</sub><sup>3-</sup> solution in 1.0 M KNO<sub>3</sub>. These results showed that the electron transfer kinetics of H<sub>2</sub>SO<sub>4</sub>-G and H<sub>3</sub>PO<sub>4</sub>-G were significantly faster than graphene prepared by the classical method and the other carbonaceous materials are shown in Table S1. The fact that the rate of electron transfer for graphene electrodes prepared by the acidic method was higher means that they have lower polarizability and therefore higher electrocatalytic activity. Accordingly the  $k^0$  values are in good accordance with the specific capacitance values listed in Table 2. It is observed that NaBH<sub>4</sub>-G electrode with high capacitance values have lower electron transfer rate values which verifies this fact.

$$k^0 = \Psi \left( \frac{D_0 \pi \nu F}{RT} \right)^{1/2} \quad (1)$$

**Table S1.** The heterogeneous electron rate constants ( $k^0$ ) of various carbonaceous materials.

| <b>Carbonaceous Materials</b>             | <b>Heterogeneous Electron Rate Constants (<math>k^0</math>), <math>\text{cm}\cdot\text{s}^{-1}</math></b> | <b>Reference</b> |
|-------------------------------------------|-----------------------------------------------------------------------------------------------------------|------------------|
| Graphite (Surface defects free)           | $10^{-6}$                                                                                                 | [2]              |
| Basal HOPG                                | $2.26\times 10^{-5}$                                                                                      | [3]              |
| Edge HOPG                                 | $5\times 10^{-3}$                                                                                         | [3]              |
| Glassy carbon                             | $3\times 10^{-3}$                                                                                         | [3]              |
| Single sheet graphene                     | $1.2\times 10^{-3}$                                                                                       | [4]              |
| Few layer graphene                        | $7\times 10^{-4}$                                                                                         | [4]              |
| Bulk graphene (Thermally reduced)         | $5\times 10^{-3}$                                                                                         | [3]              |
| Bulk graphene (Electrochemically reduced) | $2.8\times 10^{-3}$                                                                                       | [3]              |
| Bulk graphene (Chemically reduced)        | $3.9\times 10^{-3}$                                                                                       | [3]              |
| Graphene oxide (GO)                       | $5.43\times 10^{-5}$                                                                                      | [3]              |
| H <sub>2</sub> SO <sub>4</sub> -G         | $0.0122 \pm 0.0096$                                                                                       | In this study    |
| H <sub>3</sub> PO <sub>4</sub> -G         | $0.0305 \pm 0.00293$                                                                                      | In this study    |

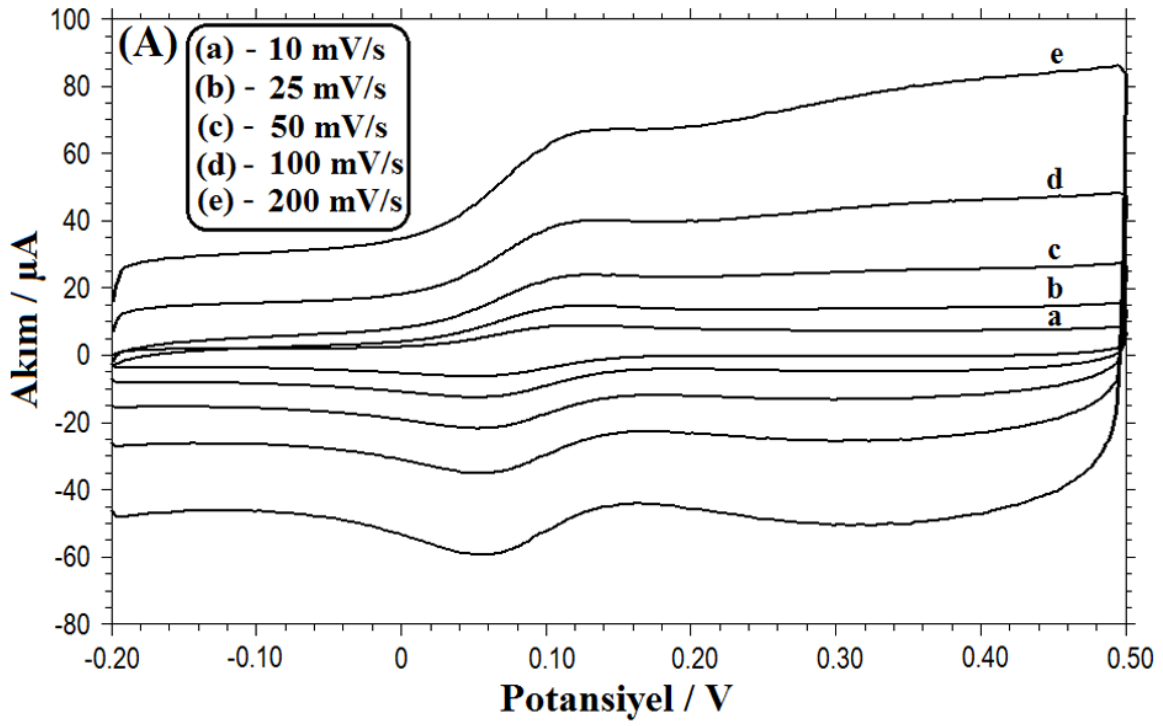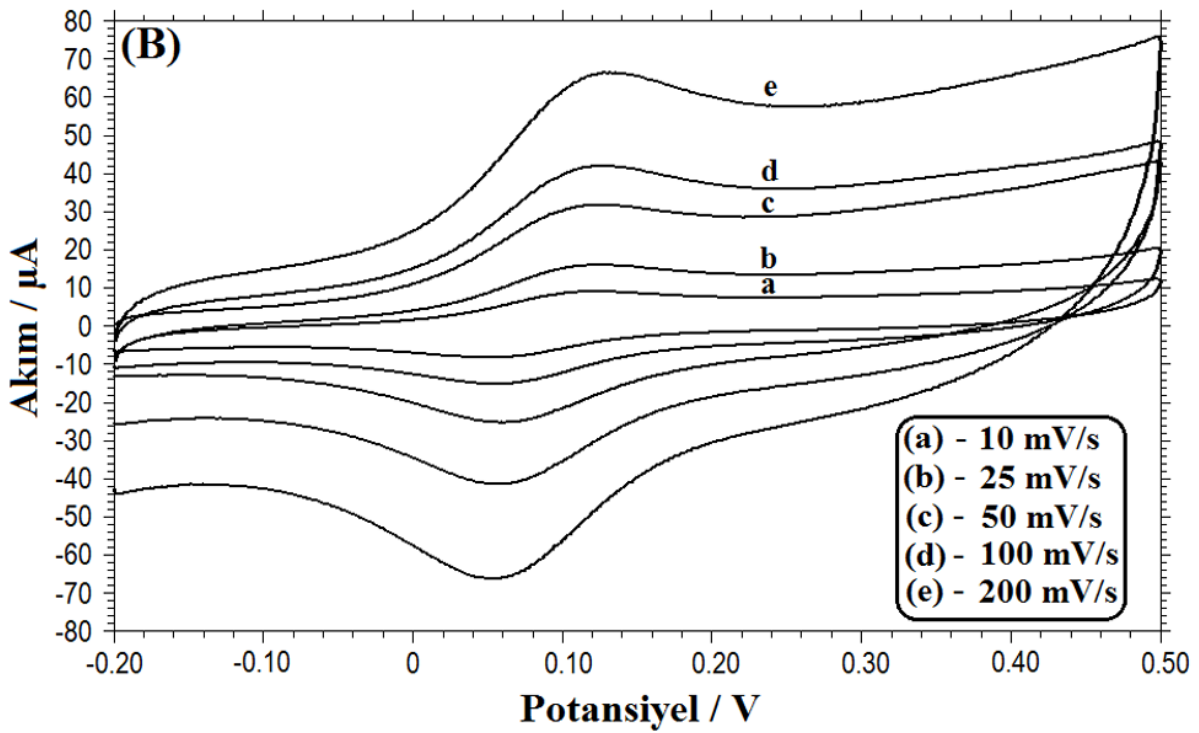

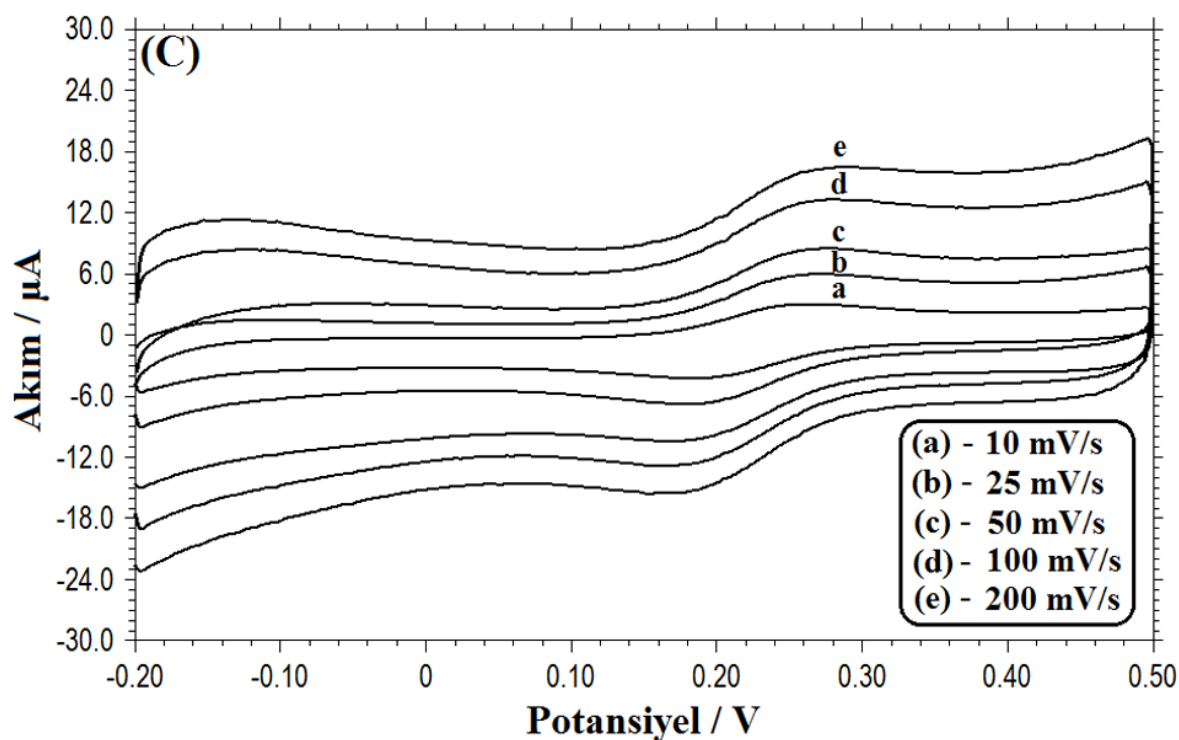

**Figure S1.** Cyclic voltammograms of 1.0 mM ferricyanide in 1.0 M KNO<sub>3</sub> at various scan rates on H<sub>2</sub>SO<sub>4</sub>-G (A), H<sub>3</sub>PO<sub>4</sub>-G (B) and NaBH<sub>4</sub>-G (C) modified electrodes

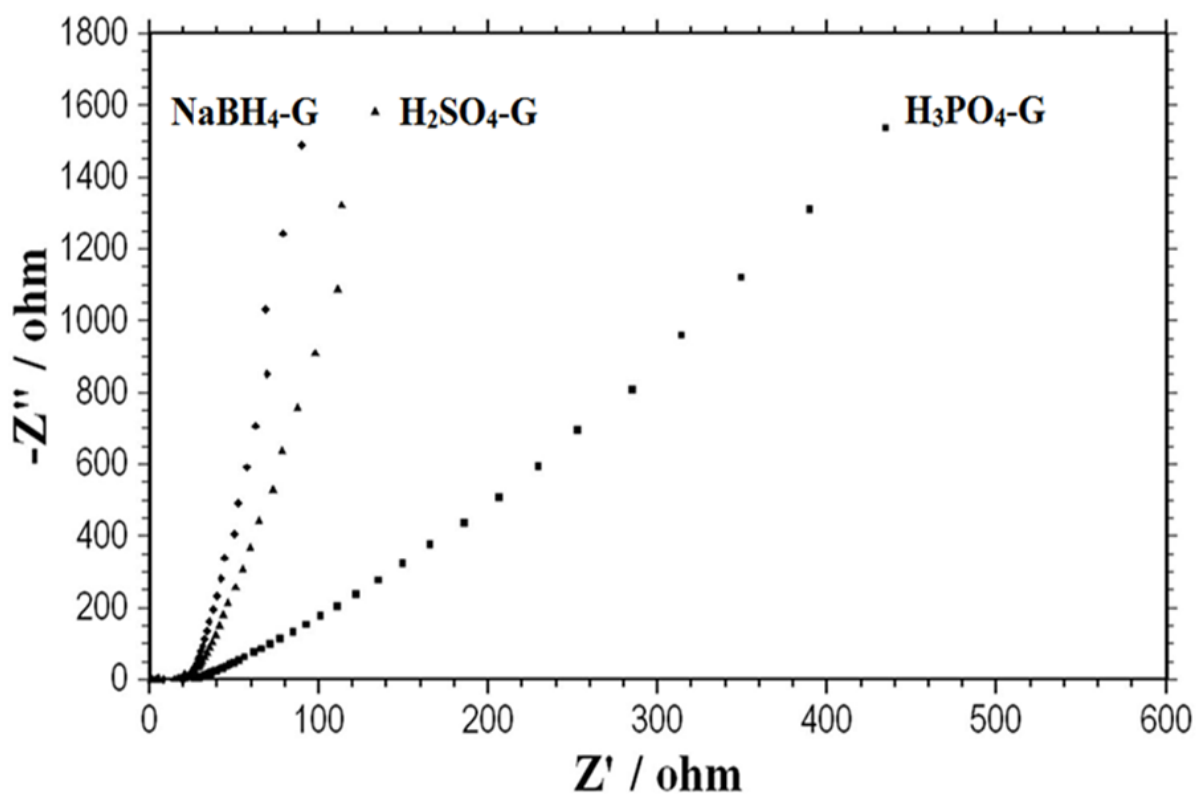

**Figure S2.** Electrochemical impedance spectra of graphene samples obtained at frequencies of 100,000 to 1 Hz in 1.0 M KCl.

Capacitance property of an electrode can be described with steepness of the impedance plots. The ideal situation for a capacitor is  $90^\circ$ . The angle is much steeper for  $\text{NaBH}_4\text{-G}$  compared to other two materials namely  $\text{H}_2\text{SO}_4\text{-G}$  and  $\text{H}_3\text{PO}_4\text{-G}$  shown in Figure S2. The suitability of a material for the electrochemical applications is inversely related to its capacitance feature. Therefore it can conveniently be claimed that  $\text{H}_3\text{PO}_4\text{-G}$  is the most suitable material for the electroanalytical applications.

## References

- (1) R.S. Nicholson, Theory and application of cyclic voltammetry for measurement of electrode reaction kinetics, *Anal. Chem.*, 1965, **37**, 1351-1355.
- (2) R.S. Robinson, K. Sternitzke, M.T. McDermott and R.L. McCreery, Morphology and Electrochemical Effects of Defects on Highly Oriented Pyrolytic Graphite, *J. Electrochem. Soc.*, 1991, **138**, 2412– 2418.
- (3) A. Ambrosi, A. Bonanni, Z. Sofer, J.S. Cross and M. Pumera, Electrochemistry at Chemically Modified Graphenes, *Chem. Eur. J.*, 2011, **17**, 10763–10770.
- (4) A.T. Valota, I.A. Kinloch, K.S. Novoselov, C. Casiraghi, A. Eckmann, E.W. Hill and R.A.W. Dryfe, Electrochemical Behavior of Monolayer and Bilayer Graphene, *ACS Nano*, 2011, **5**, 8809–8815.
